# Supplementary material
Source: PubMed Central journal article supplement (PMC3810956)
Supplement: NIHMS505245-supplement-1.pdf [file NIHMS505245-supplement-1.pdf]

## SUPPORTING INFORMATION

### Surface Decorated Gold Nanoparticles by Linear and Cyclic Peptides as Molecular Transporters

Amir Nasrolahi Shirazi,<sup>a</sup> Rakesh Kumar Tiwari,<sup>a,b</sup> Donghoon Oh,<sup>a</sup> Brian Sullivan,<sup>a</sup> Kellen McCaffrey,<sup>a</sup> Dindyal Mandal,<sup>a</sup> and Keykavous Parang<sup>a,b,\*</sup>

<sup>a</sup>*Department of Biomedical and Pharmaceutical Sciences, College of Pharmacy, University of Rhode Island, Kingston, Rhode Island 02881, United States;* <sup>b</sup>*College of Pharmacy, Chapman University, Orange, California, United States 92866*

**kparang@uri.edu**

\*Corresponding author. K. Parang: 7 Greenhouse Road, Department of Biomedical and Pharmaceutical Sciences, College of Pharmacy, University of Rhode Island, Kingston, Rhode Island, 02881, United States; Tel.: +1-401-874-4471; Fax: +1-401-874-5787; E-mail address: kparang@uri.edu

| <b>Table of Contents</b>                                                                                                               | <b>Page</b> |
|----------------------------------------------------------------------------------------------------------------------------------------|-------------|
| Solid-phase synthesis of l(KW) <sub>4</sub> , c[KW] <sub>4</sub> , and F'-l(KW) <sub>5</sub>                                           | <b>S3</b>   |
| Solid-phase synthesis of linear peptides (KW) <sub>4</sub> and (KW) <sub>5</sub>                                                       | <b>S4</b>   |
| UV-Vis spectroscopy of peptide-capped gold nanoparticles                                                                               | <b>S5</b>   |
| Cytotoxicity of peptides and corresponding P-AuNPs                                                                                     | <b>S6</b>   |
| Membrane integrity of SK-OV-3 cells in the presence of P-AuNPs                                                                         | <b>S6</b>   |
| Intracellular Release of Dox                                                                                                           | <b>S7</b>   |
| Fluorescence of CPT in the presence of c[KW] <sub>5</sub> -AuNPs and l[(KW) <sub>5</sub> -AuNPs (1:1 molar ratio) after 4 h incubation | <b>S11</b>  |
| UV-Vis spectroscopy of c[KW] <sub>4</sub> -AuNPs and c[RW] <sub>4</sub> -AuNPs                                                         | <b>S12</b>  |

**Solid-phase synthesis of l(KW)<sub>4</sub>, c[KW]<sub>4</sub>, and F'-l(KW)<sub>5</sub>.** As a representative example, the synthesis of cyclic [KW]<sub>4</sub> was accomplished through assembling of the linear peptide on the H-Trp(Boc)-2-chlorotrityl chloride resin, followed by *N*-terminal Fmoc deprotection by piperidine in DMF (20% v/v). After cleavage from trityl resin in the presence of the cleavage cocktail acetic acid/TFE/DCM (1:2:7 v/v/v), the peptide underwent cyclization in the presence of HOAt and DIC, final deprotection with reagent R (TFA/thioanisole/EDT/anisole (90:5:3:2 v/v/v/v)), and purification by HPLC to afford cyclic [KW]<sub>4</sub> (Scheme S1). Linear (KW)<sub>4</sub> was synthesized by assembling of amino acids on Fmoc-Trp(Boc)-Wang resin using Fmoc synthesis and cleavage (Scheme S2). Other cyclic peptides were synthesized using a similar protocol by using appropriate resins and protected amino acids.

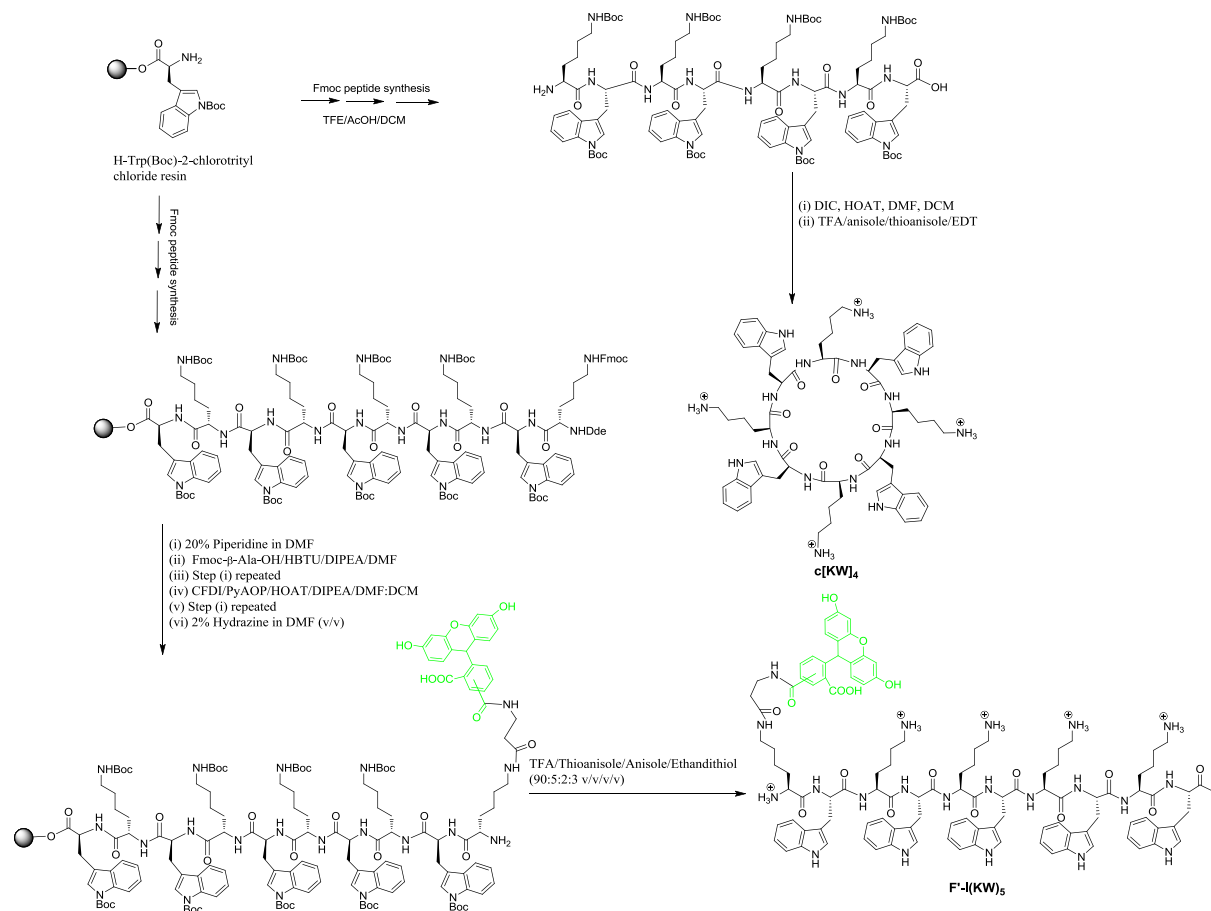

**Scheme S1.** Solid-phase synthesis of l(KW)<sub>4</sub>, c[KW]<sub>4</sub>, and F'-l(KW)<sub>5</sub>.

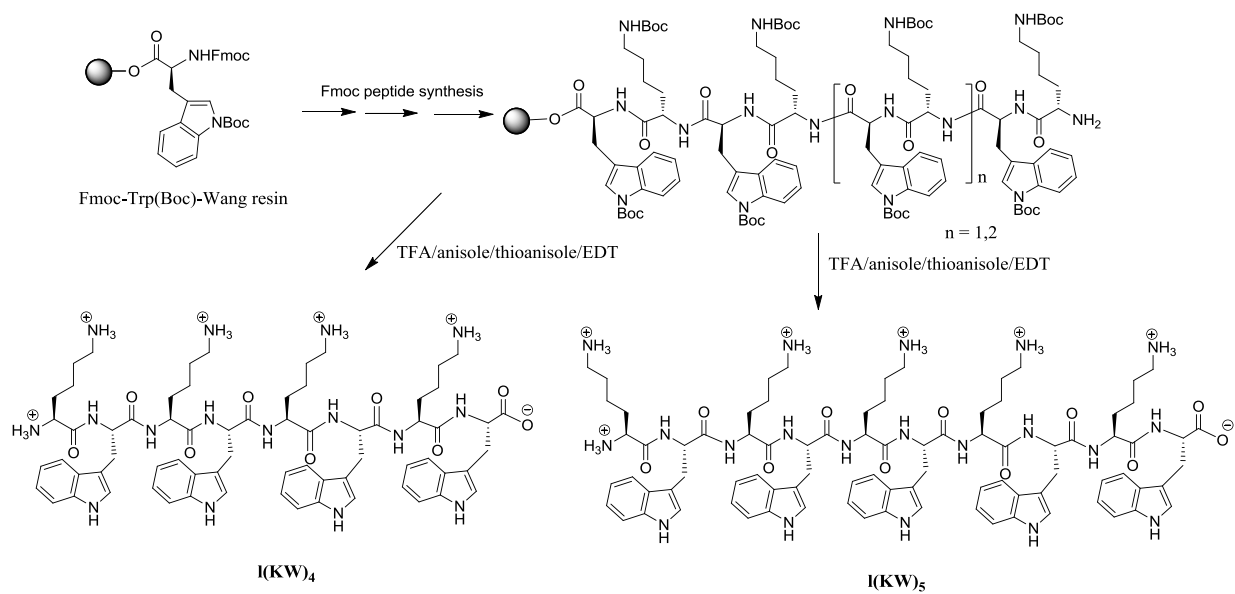

**Scheme S2.** Solid-phase synthesis of linear peptides  $(KW)_4$  and  $(KW)_5$ .

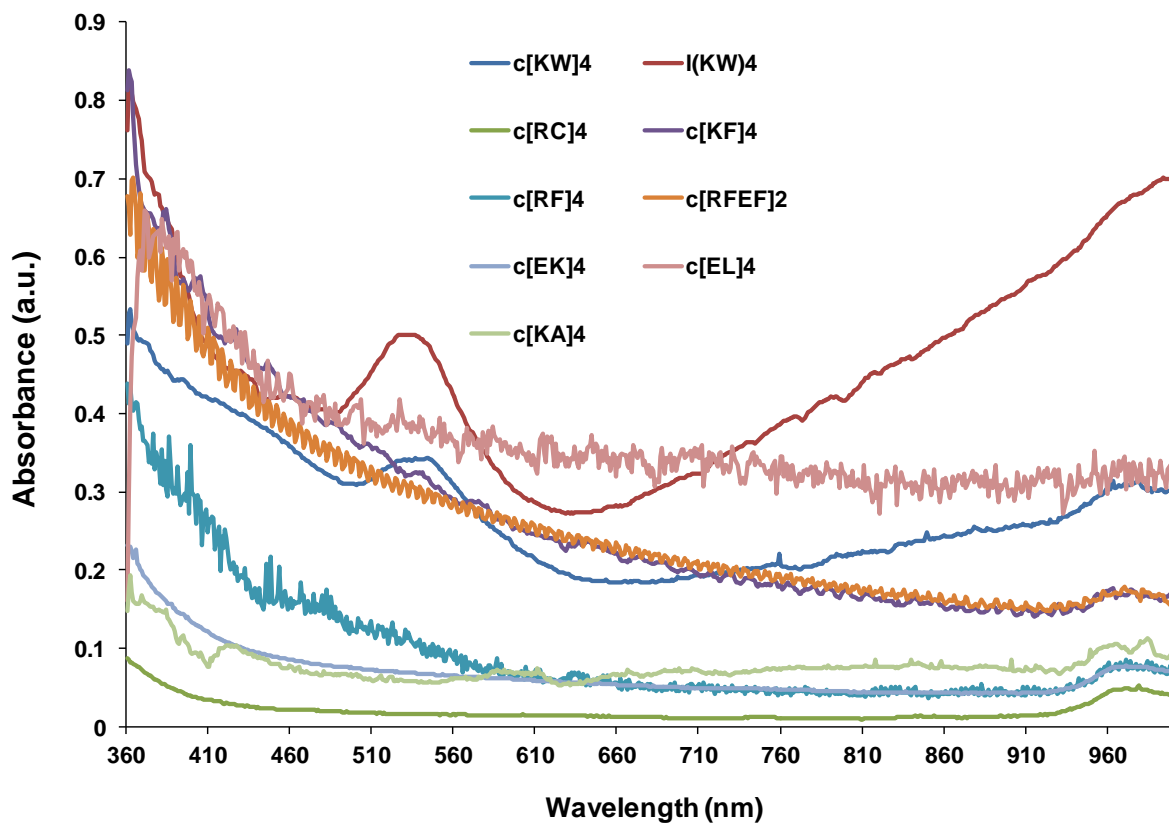

**Figure S1.** UV-Vis spectroscopy of peptide-capped gold nanoparticles.

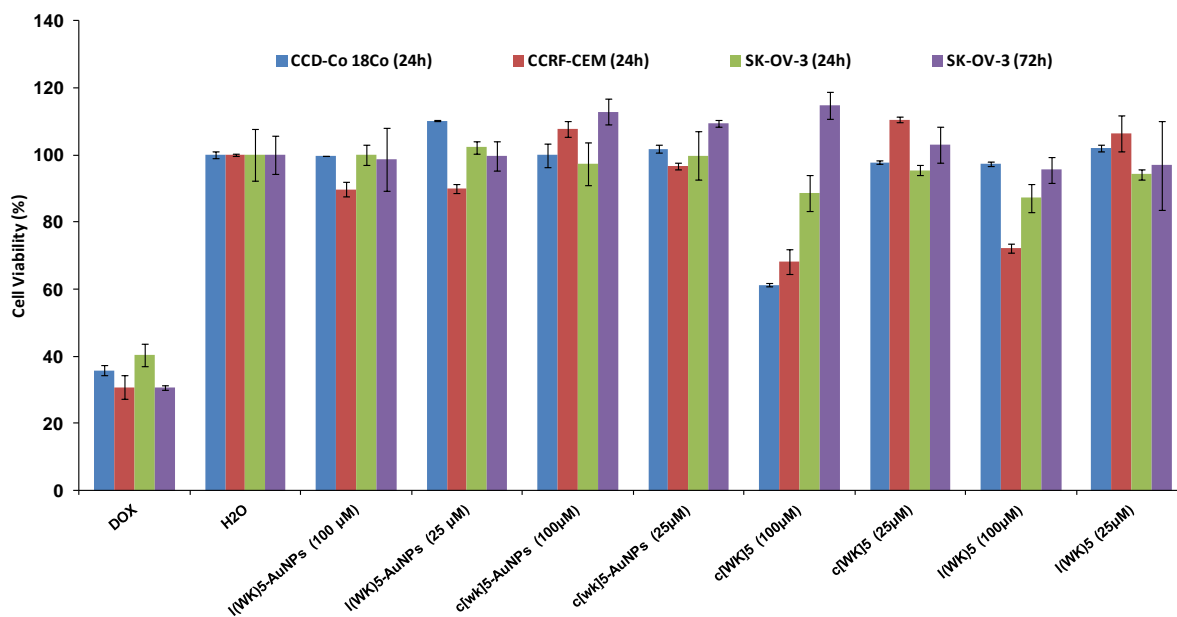

**Figure S2.** Cytotoxicity of peptides and corresponding P-AuNPs.

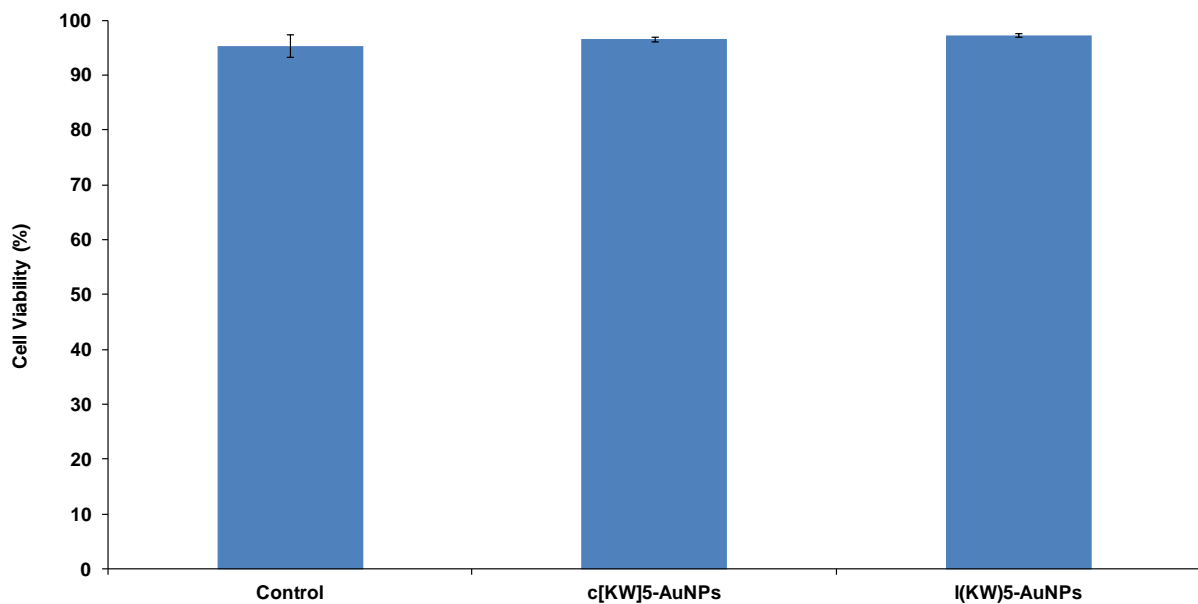

**Figure S3.** Membrane integrity of SK-OV-3 cells in the presence of P-AuNPs (50 μM) (mean ± SD, n =3).

### Intracellular Release of Dox

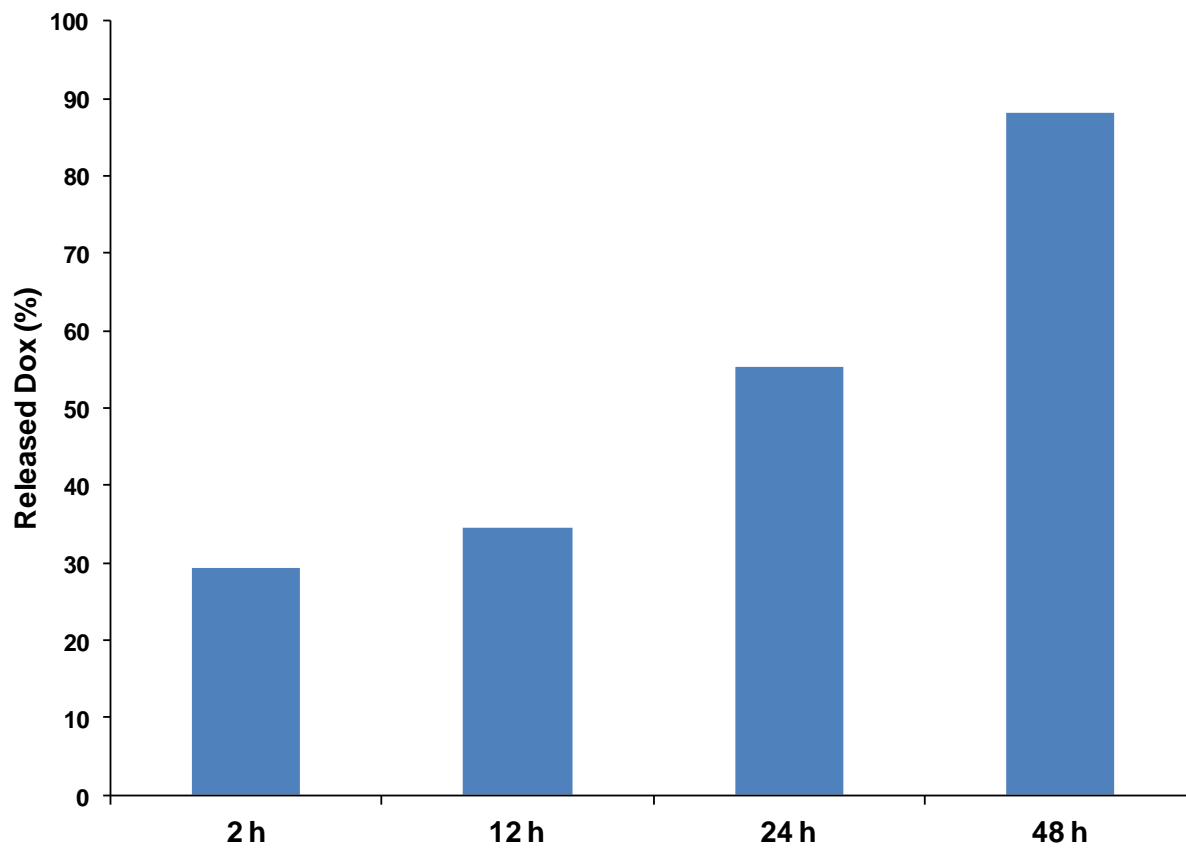

**Figure S4.** Intracellular release of Dox after incubation of Dox-loaded c[WK]<sub>5</sub>-AuNPs with CCRF-CEM cells.

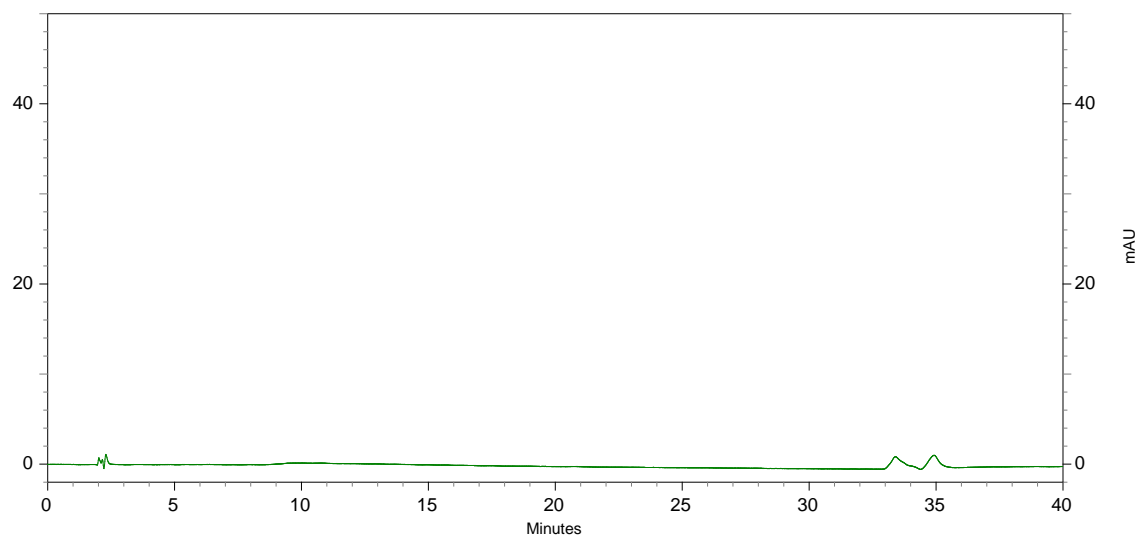

**Figure S5.** The chromatogram of blank solution without Dox-loaded c[WK]<sub>5</sub>-AuNPs.

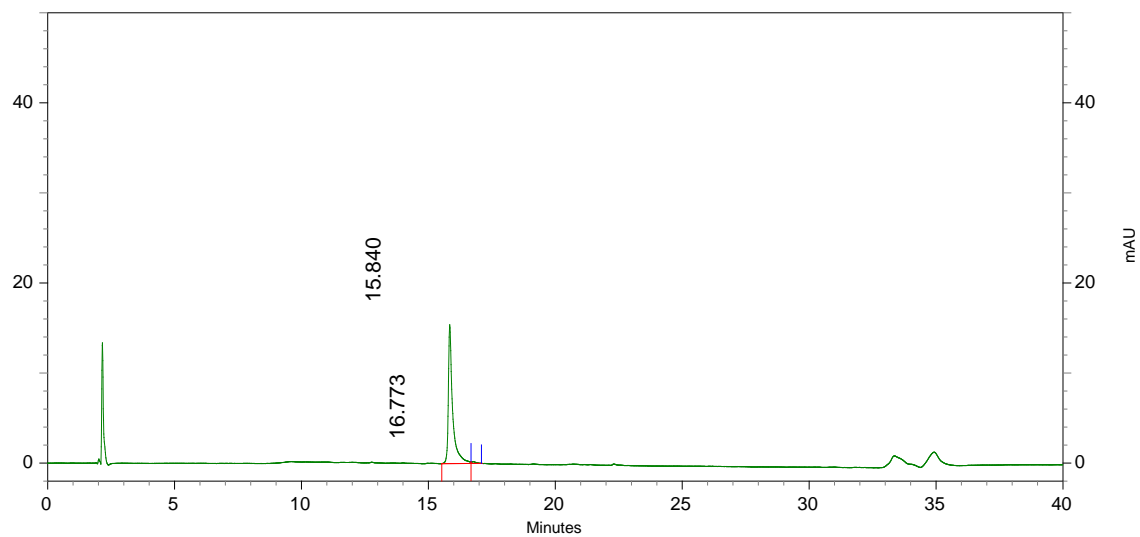

**Figure S6.** HPLC chromatogram of Dox-loaded c[WK]<sub>5</sub>-AuNPs after 2 h incubation with CCRF-CEM cells.



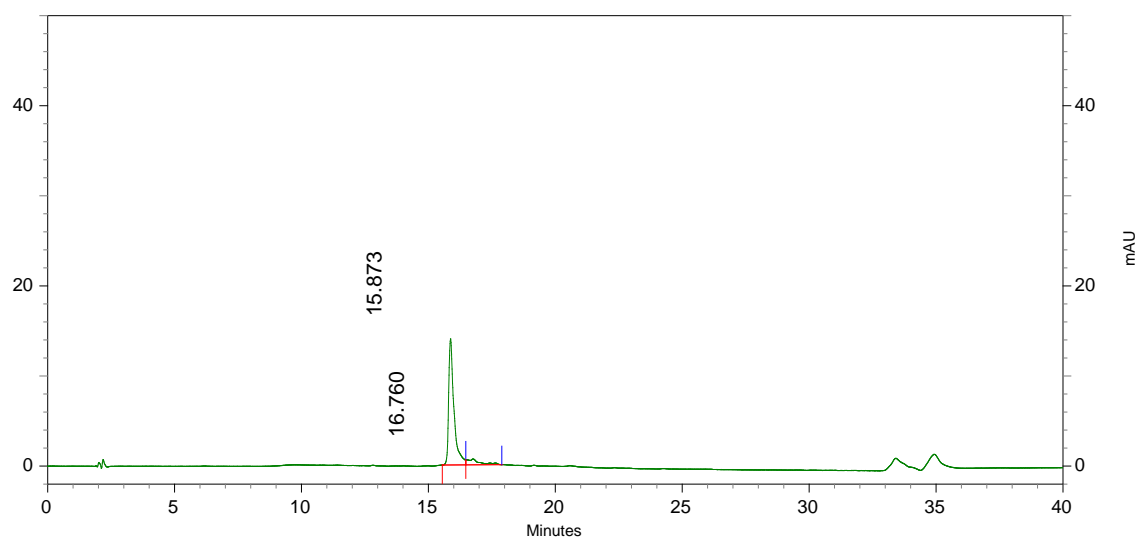

**Figure S7.** HPLC chromatogram of Dox-loaded c[WK]<sub>5</sub>-AuNPs after 12 h incubation with CCRF-CEM cells.

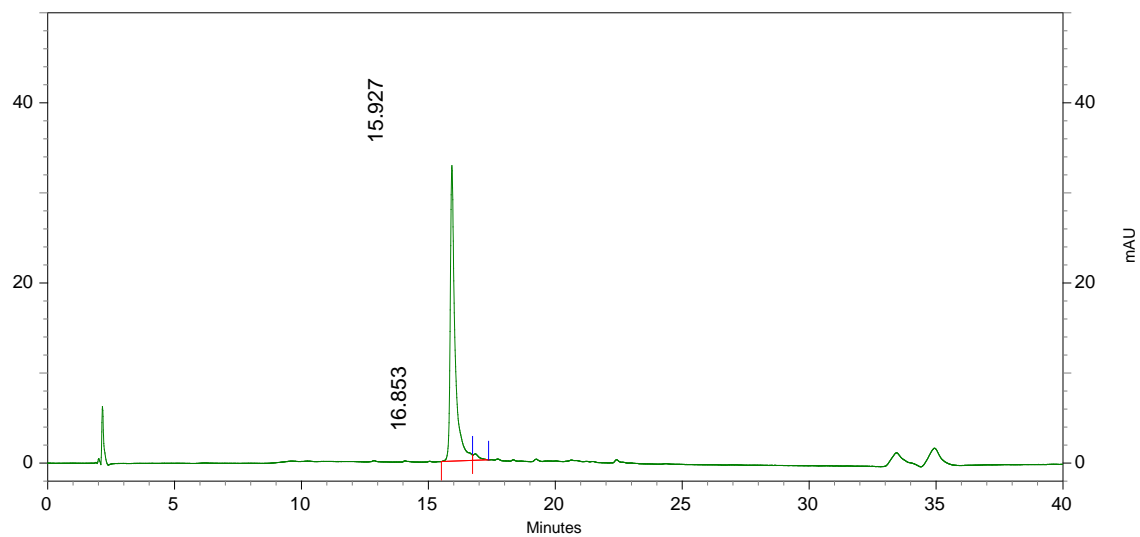

**Figure S8.** HPLC chromatogram of Dox-loaded c[WK]<sub>5</sub>-AuNPs after 24 h incubation with CCRF-CEM cells.

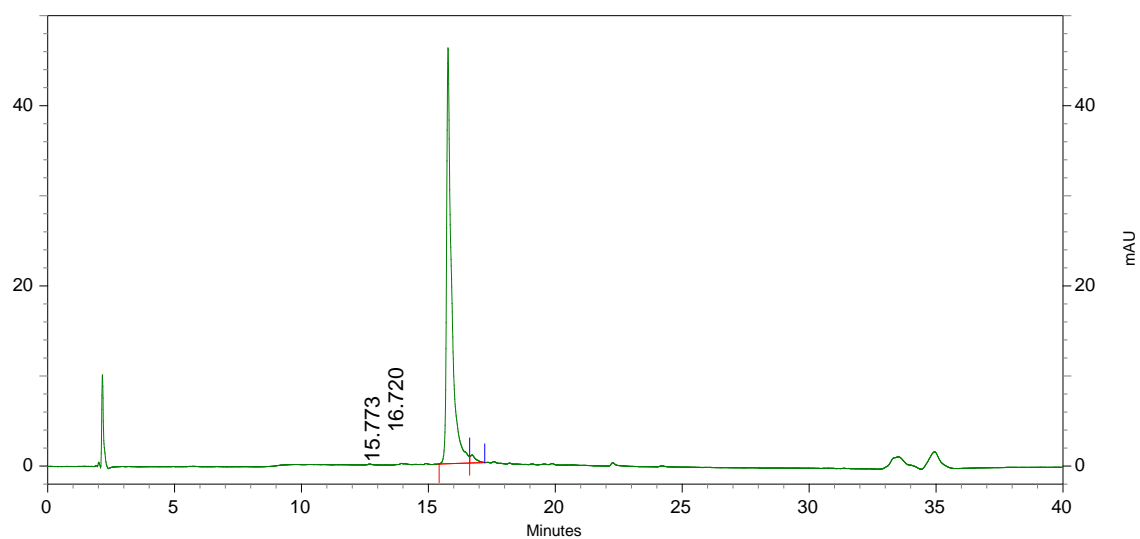

**Figure S9.** HPLC chromatogram of Dox-loaded c[WK]<sub>5</sub>-AuNPs after 48 h incubation with CCRF-CEM cells.

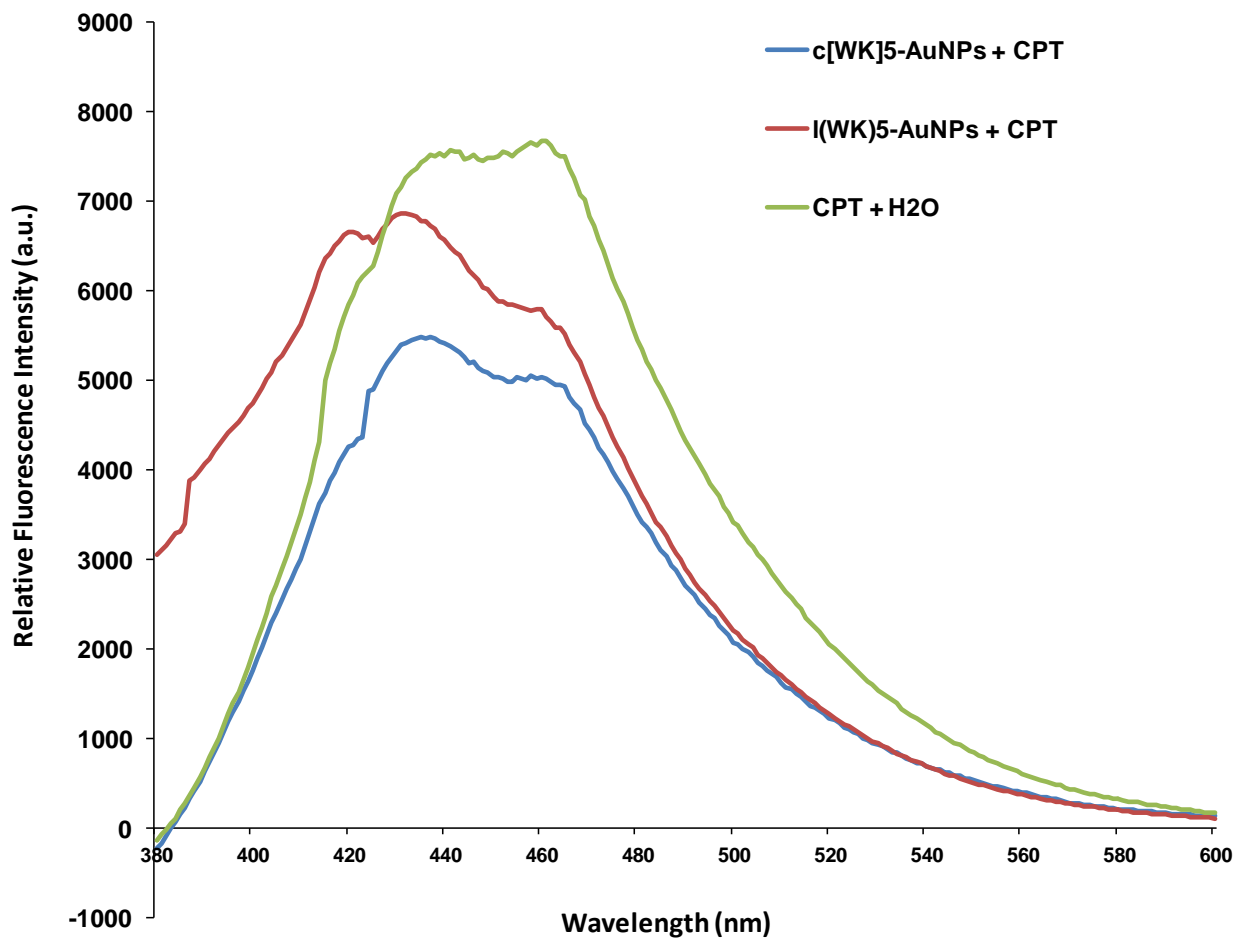

**Figure S10.** Fluorescence of CPT in the presence of c[ $\text{KW}$ ]<sub>5</sub>-AuNPs and l[ $\text{KW}$ ]<sub>5</sub>-AuNPs (1:1 molar ratio) after 4 h incubation.

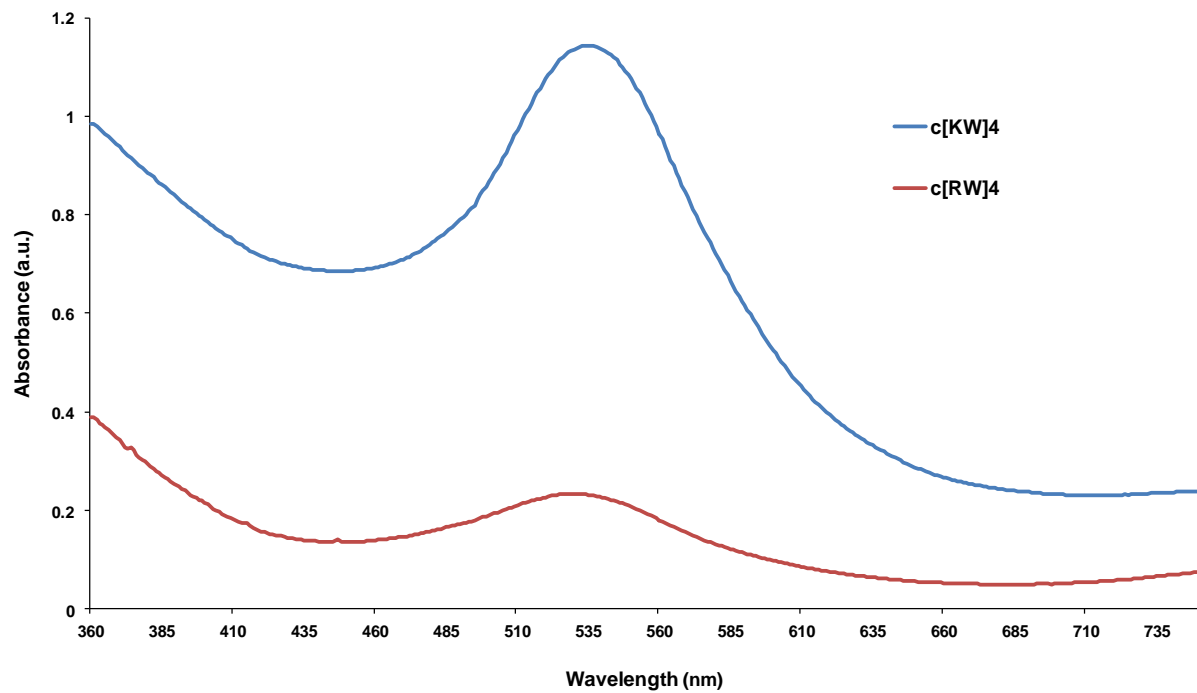

**Figure S11.** UV-Vis spectroscopy of c[KW]<sub>4</sub>-AuNPs and c[RW]<sub>4</sub>-AuNPs.
